# Supplementary material
Source: publisher figshare collection journal article supplement (https://aacr.figshare.com/articles/dataset/_/23802539)
Supplement: Supplementary file 1 [file 41749022]

**Supplementary Table S1. Patient characteristics.**

| <b>Cancer type</b>       | Primary CRC | Metastatic CRC peritoneum | Metastatic CRC liver | Primary EC | HNSCC      | NSCLC      |
|--------------------------|-------------|---------------------------|----------------------|------------|------------|------------|
| <b>N</b>                 | 17          | 25                        | 3                    | 23         | 5          | 4          |
| <b>Gender (female)</b>   | 4 (24%)     | 11 (44%)                  | 0 (100%)             | 5 (22%)    | 1 (20%)    | 0 (0%)     |
| <b>Age mean (range)</b>  | 67 (53-77)  | 62 (41- 79)               | 67 (62- 71)          | 67 (43-79) | 62 (48-74) | 69 (60-76) |
| <b>Stage</b>             |             |                           |                      |            |            |            |
| I                        | 5 (29%)     |                           |                      | 1 (4%)     |            |            |
| II                       | 1 (6%)      |                           |                      | 4 (17%)    |            | 1 (25%)    |
| III                      | 6 (35%)     |                           |                      | 12 (52%)   |            | 2 (50%)    |
| IV                       | 7 (41%)     | 25 (100%)                 | 3 (100%)             | 2 (9%)     | 5 (100%)   | 1 (25%)    |
| Unknown                  |             |                           |                      | 4 (17%)    |            |            |
| <b>Treatment</b>         |             |                           |                      |            |            |            |
| Chemotherapy             | 1 (6%)      | 11 (44%)                  | 2 (67%)              |            |            | 1 (25%)    |
| Radiotherapy             |             | 2 (8%)                    | 1 (33%)              |            |            | 1 (25%)    |
| Chemoradiotherapy        |             | 1 (4%)                    |                      |            |            |            |
| Untreated                | 16 (94%)    | 11 (44%)                  |                      | 23 (100%)  | 5 (100%)   | 2 (50%)    |
| <b>Mutational status</b> |             |                           |                      |            |            |            |
| No RAS/ BRAF mutation    |             | 1 (4%)                    |                      |            |            |            |
| KRAS mutation            | 1 (6%)      | 1 (4%)                    |                      |            |            |            |
| BRAF mutation            |             | 4 (16%)                   |                      |            |            |            |
| Unknown                  | 16 (94%)    | 19 (76%)                  | 3 (100%)             | 23 (100%)  | 5 (100%)   | 4 (100%)   |
| <b>MSI</b>               |             |                           |                      |            |            |            |
| MMR proficient/ MSS      | 1 (6%)      | 12 (48%)                  |                      | 6 (26%)    |            |            |
| MSI                      |             | 3 (12%)                   |                      |            |            |            |
| Unknown                  | 16 (94%)    | 10 (40%)                  | 3 (100%)             | 17 (74%)   | 5 (100%)   | 4 (100%)   |

Abbreviations: CRC: colorectal cancer, EC: esophageal cancer (n=18 adenocarcinomas and n=5 squamous cell carcinomas), HNSCC: head and neck squamous cell carcinoma, NSCLC: non-small cell lung cancer, AC: adenocarcinoma, SCC: squamous cell carcinoma.

**Supplementary Table S2. Details flow-cytometry antibodies.**

| <b>Marker</b>          | <b>Fluorochrome</b> | <b>Clone</b>   | <b>Catalogue number</b> | <b>Company</b>   | <b>Host</b>    |
|------------------------|---------------------|----------------|-------------------------|------------------|----------------|
| Anti-Illama            | FITC                | Polyclonal     | BET A160-100F           | Bioke            | Goat           |
| Anti-VHH               | iFluor555           | 96A3F5         | A01863                  | Genscript        | Rabbit         |
| Anti-VHH               | iFluor 647          | 45H8           | 18L001648               | Genscript        | Rabbit         |
| Anti-his-tag           | PE                  | A32            | A568                    | Biolegend        | Mouse          |
| Streptavidin           | APC                 | Not applicable | 17-4317-82              | eBioscience      | Not applicable |
| V $\delta$ 2-TCR       | BV711               | B6             | 331412                  | Biolegend        | Mouse          |
| V $\delta$ 2-TCR       | FITC                | IMMU389        | PN IM1464               | Beckman Coulter  | Mouse          |
| V $\gamma$ 9-TCR       | APC                 | B3             | 331310                  | Biolegend        | Mouse          |
| V $\gamma$ 9-TCR       | FITC                | IMMU360        | IM1463                  | Beckman Coulter  | Mouse          |
| TCR pan $\gamma\delta$ | PE                  | B1             | 331210                  | Biolegend        | Mouse          |
| TCR pan $\gamma\delta$ | BV421               | B1             | B324431                 | Ozyme            | Mouse          |
| CD3                    | BV421               | SK7            | 563798                  | BD Horizon       | Mouse          |
| CD3                    | PerCPy5.5           | SK7            | 332771                  | BD Biosciences   | Mouse          |
| CD3                    | PerCPy5.5           | SP34-2         | 552852                  | Becton Dickinson | Mouse          |
| CD3                    | PE                  | SK7            | 345765                  | BD Biosciences   | Mouse          |
| CD3                    | AF700               | SP34-2         | 557917                  | BD Biosciences   | Mouse          |
| CD3                    | BUV395              | SP34-2         | 564117                  | BD Biosciences   | Mouse          |
| CD4                    | FITC                | 345768         | SK3                     | BD Biosciences   | Mouse          |
| CD4                    | AF700               | RPA-T4         | 557922                  | BD Pharmingen    | Mouse          |
| CD8                    | V500                | SK1            | 561618                  | BD Horizon       | Mouse          |
| CD8                    | FITC                | 345772         | SK1                     | BD Biosciences   | Mouse          |
| CD16                   | BV650               | 3G8            | 563692                  | BD Biosciences   | Mouse          |
| CD16                   | FITC                | 555406         | 3G8                     | BD pharmingen    | Mouse          |
| CD25                   | PE                  | M- A251        | 555432                  | BD pharmingen    | Mouse          |
| CD25                   | APC                 | 2A3            | 340907                  | BD Biosciences   | Mouse          |
| CD25                   | PE-Cy7              | M-A251         | 356108                  | Biolegend        | Mouse          |
| CD25                   | PE-Dazzle 594       | M-A251         | B327560                 | Becton Dickinson | Mouse          |
| CD45                   | AF700               | HI30           | 304024                  | Biolegend        | Mouse          |
| CD45                   | BV786               | D058-1283      | 563861                  | BD Biosciences   | Mouse          |
| CD45RA                 | APC-Cy7             | HI100          | 560674                  | BD Pharmingen    | Mouse          |
| CD56                   | FITC                | NCAM16.2       | 345811                  | BD Biosciences   | Mouse          |
| CD69                   | APC-Fire750         | FN50           | 310946                  | Biolegend        | Mouse          |
| CD69                   | BV711               | FN50           | B322918                 | Ozyme            | Mouse          |
| CD107a                 | PE                  | eBioH4A3       | 12-1079-42              | eBioscience      | Mouse          |
| EpCAM                  | FITC                | 324204         | 9C4                     | Biolegend        | Mouse          |
| PD-1                   | BV786               | 563789         | EH12.1                  | BD Horizon       | Mouse          |
| LAG-3                  | PE-Cy7              | 25-2239-42     | 3DS223H                 | eBioscience      | Mouse          |
| TIM-3                  | BV421               | F38-2E2        | 345008                  | Biolegend        | Mouse          |
| CTLA-4                 | PE-CF595            | BNI3           | 562742                  | BD Horizon       | Mouse          |
| FoxP3                  | PE                  | PCH101         | 12-4776-42              | eBioscience      | Rat            |
| 7AAD                   | PerCPy5.5           | Not applicable | A9400-1MG               | Sigma            | Not applicable |

**Supplementary Table S3. Toxicokinetic parameters for EGFR-Vy9 bsTCE following a single intravenous infusion to female cynomolgus monkeys.**

| Animal ID | Dose (mg/kg) | T <sub>max</sub> (h) | C <sub>max</sub> (µg/ml) | nC <sub>max</sub> (µg/ml)/(mg/kg) | T <sub>1/2</sub> (h) | AUC <sub>0-∞</sub> (µg·h/ml) | nAUC <sub>0-∞</sub> (µg·h/ml)/(mg/kg) | C1 (L/h/kg) | V <sub>z</sub> (L/kg) |
|-----------|--------------|----------------------|--------------------------|-----------------------------------|----------------------|------------------------------|---------------------------------------|-------------|-----------------------|
| L08       | 0.03         | 0.5                  | 0.25                     | 8.37                              | 13.7                 | 2.48                         | 82.7                                  | 0.012       | 0.24                  |
| J08       | 0.1          | 1                    | 0.50                     | 5.04                              | NC                   | NC                           | NC                                    | NC          | NC                    |
| Y06       | 0.3          | 1                    | 1.38                     | 4.59                              | 7.93                 | 2.53                         | 0.12                                  | 0.12        | 1.36                  |

Abbreviations: T<sub>max</sub>: time after dosing at which the maximum concentration was observed. C<sub>max</sub>: the maximum concentration observed after dosing. nC<sub>max</sub>: the C<sub>max</sub> normalized for the dose received. AUC<sub>0-∞</sub>: the area under the concentration versus time curve from time-point t=0h to infinity. nAUC<sub>0-∞</sub>: the AUC<sub>0-∞</sub> normalized for the dose received. T<sub>1/2</sub>: the elimination half-life, determined by linear regression of at least three data points on the terminal phase of the log (Concentration) vs time plot. C1: clearance. V<sub>z</sub>: apparent volume of distribution. NC: not calculated, not enough time point on the elimination phase.

**Supplementary Table S4. Toxicokinetic parameters for EGFR-Vy9-Fc bsTCE following multiple intravenous infusions to female cynomolgus monkeys.**

| Animal ID | Dose (mg/kg) | Day | T <sub>max</sub> (h) | C <sub>max</sub> (µg/ml) | T <sub>1/2</sub> (h) | AUC <sub>0-tlast</sub> µg·h/mL | AUC <sub>0-∞</sub> (µg·h/ml) | C1 (ml/h/kg) | V <sub>z</sub> (ml/kg) |
|-----------|--------------|-----|----------------------|--------------------------|----------------------|--------------------------------|------------------------------|--------------|------------------------|
| 4916      | 1            | 0   | 1                    | 17.3                     | 110.5                | 910.0                          | 1,383.7                      | 0.72         | 115.2                  |
| 4916      | 1            | 7   | 0.5                  | 22.7                     | 106.1                | 1,189.7                        | 1,785.3                      | 0.56         | 85.7                   |
| 4916      | 1            | 14  | 2.5                  | 16.4                     | NC                   | 730.2                          | NC                           | NC           | NC                     |
| 4916      | 1            | 21  | 1                    | 6.6                      | NC                   | 25.5                           | NC                           | NC           | NC                     |
| 4917      | 5            | 0   | 1                    | 102.0                    | 103.0                | 6,213.0                        | 9,190.3                      | 0.54         | 80.8                   |
| 4917      | 5            | 7   | 1                    | 132.2                    | 114.6                | 7,894.1                        | 12,228.1                     | 0.41         | 67.6                   |
| 4917      | 5            | 14  | 2.5                  | 98.6                     | NC                   | 7,956.7                        | NC                           | NC           | NC                     |
| 4917      | 5            | 21  | 1                    | 126.8                    | NC                   | 2,161.5                        | NC                           | NC           | NC                     |
| 4918      | 23           | 0   | 1                    | 482.0                    | 127.4                | 30,268.9                       | 49,412.4                     | 0.47         | 85.5                   |
| 4918      | 23           | 7   | 1                    | 663.3                    | 113.6                | 41,377.1                       | 64,409.5                     | 0.36         | 58.5                   |
| 4918      | 23           | 14  | 2.5                  | 548.5                    | NC                   | 47,061.6                       | NC                           | NC           | NC                     |
| 4918      | 23           | 21  | 1                    | 792.5                    | NC                   | 13,911.3                       | NC                           | NC           | NC                     |

Abbreviations: AUC<sub>0-tlast</sub>: the area under the concentration versus time curve from time-point t=0h to the last measurable concentration.

Supplementary Table S5. Clinical, hematological and biochemical parameters in NHP pre- and post-administration of EGFR-V $\gamma$ 9 bsTCE.

|                                               | Day     | EGFR-V $\gamma$ 9 bsTCE  |                         |                         |
|-----------------------------------------------|---------|--------------------------|-------------------------|-------------------------|
|                                               |         | 0.03 mg kg <sup>-1</sup> | 0.1 mg kg <sup>-1</sup> | 0.3 mg kg <sup>-1</sup> |
| BW (kg)                                       | -14     | 3.9                      | 4.58                    | 4.8                     |
|                                               | -7      | 3.9                      | 4.5                     | 4.62                    |
|                                               | 0       | 3.94                     | 4.48                    | 4.7                     |
|                                               | 7       | 3.9                      | 4.4                     | 4.68                    |
| RBC (x10 <sup>12</sup> L <sup>-1</sup> )      | -14     | 5.81                     | 7.03                    | 6.66                    |
|                                               | -7      | 5.77                     | 6.61                    | 6.15                    |
|                                               | 1       | 5.47                     | 5.96                    | 6.16                    |
|                                               | 2       | 5.38                     | 5.78                    | 5.92                    |
|                                               | 3       | 4.9                      | 5.57                    | 5.72                    |
|                                               | 4       | 4.63                     | 5.28                    | 5.72                    |
|                                               | 5       | 4.42                     | 4.96                    | 5.04                    |
|                                               | 6       | 4.4                      | 4.92                    | 4.74                    |
|                                               | 7 + 24h | 4.21                     | 4.61                    | 4.65                    |
| PLT (x10 <sup>9</sup> L <sup>-1</sup> )       | -14     | 551                      | 372                     | 372                     |
|                                               | -7      | 561                      | 338                     | 367                     |
|                                               | 1       | 702                      | 382                     | 425                     |
|                                               | 2       | 736                      | 389                     | 420                     |
|                                               | 3       | 740                      | 397                     | 427                     |
|                                               | 4       | 722                      | 424                     | 426                     |
|                                               | 5       | 733                      | 403                     | 420                     |
|                                               | 6       | 727                      | 398                     | 447                     |
|                                               | 7 + 24h | 744                      | 414                     | 442                     |
| PT (s)                                        | -14     | 9.2                      | 10                      | 9.3                     |
|                                               | -7      | 9.2                      | 9.6                     | 9.8                     |
|                                               | 3       | 9.4                      | 9.7                     | 9.5                     |
|                                               | 7       | 9.1                      | 9.3                     | 9.4                     |
| Total bilirubin ( $\mu$ mol L <sup>-1</sup> ) | -14     | 3.4                      | 6.8                     | 3.1                     |
|                                               | -7      | 2.6                      | 7.2                     | 3                       |
|                                               | 2       | 2.1                      | 8.8                     | 3.6                     |
|                                               | 5       | 2.1                      | 7.9                     | 2.1                     |
|                                               | 7       | 2.3                      | 7.4                     | 2.1                     |
| ALP (U L <sup>-1</sup> )                      | -14     | 133                      | 120                     | 135                     |
|                                               | -7      | 142                      | 128                     | 118                     |
|                                               | 2       | 175                      | 138                     | 148                     |
|                                               | 5       | 162                      | 142                     | 143                     |
|                                               | 7       | 150                      | 134                     | 175                     |
| GGT (U L <sup>-1</sup> )                      | -14     | 47.1                     | 43.6                    | 38.8                    |
|                                               | -7      | 46.6                     | 41.8                    | 34.5                    |
|                                               | 2       | 43.7                     | 37.9                    | 31.3                    |
|                                               | 5       | 39.3                     | 37.2                    | 27.3                    |
|                                               | 7       | 40.1                     | 34.4                    | 26.9                    |
| ALT (U L <sup>-1</sup> )                      | -14     | 28.6                     | 23.3                    | 96.2                    |
|                                               | -7      | 90.5                     | 20.3                    | 74.5                    |
|                                               | 2       | 54                       | 27.9                    | 111.4                   |
|                                               | 5       | 40.2                     | 24.1                    | 77.6                    |
|                                               | 7       | 34                       | 21.4                    | 66.5                    |

|                                                       |     |    |    |    |
|-------------------------------------------------------|-----|----|----|----|
| <b>Creatinine (<math>\mu\text{mol L}^{-1}</math>)</b> | -14 | 55 | 50 | 65 |
|                                                       | -7  | 59 | 49 | 66 |
|                                                       | 2   | 52 | 44 | 65 |
|                                                       | 5   | 53 | 48 | 61 |
|                                                       | 7   | 50 | 49 | 68 |

Abbreviations: BW: body weight. RBC: red blood cells. PLT: platelets. PT: prothrombin time test ALP: alkaline phosphatase. GGT: gamma-glutamyltransferase. ALT: alanine aminotransferase. The gradual decrease in RBC over time is considered to be caused by the repeated blood draws.

Supplementary Table S6. Clinical, hematological and biochemical parameters in NHP pre- and post-administration of EGFR-Vy9-Fc bsTCE.

|                                          | Day      | EGFR-Vy9-Fc bsTCE     |                       |                        |
|------------------------------------------|----------|-----------------------|-----------------------|------------------------|
|                                          |          | 1 mg kg <sup>-1</sup> | 5 mg kg <sup>-1</sup> | 23 mg kg <sup>-1</sup> |
| Temperature (°C)                         | 6        | 38.3                  | 38.5                  | 38.2                   |
|                                          | 7        | 38.1                  | 38.3                  | 38.2                   |
|                                          | 7 + 6h   | 38.1                  | 38.4                  | 38.2                   |
|                                          | 7 + 24h  | 38.3                  | 38.7                  | 37.8                   |
|                                          | 7 + 48h  | 37.9                  | 38.3                  | 38.6                   |
|                                          | 7 + 72h  | 38.8                  | 38.2                  | 38.3                   |
|                                          | 14 - 48h | 38.5                  | 37.9                  | 37.3                   |
|                                          | 14 - 24h | 37.8                  | 38.4                  | 38                     |
|                                          | 14       | 37.3                  | 37.4                  | 37                     |
|                                          | 14 + 6h  | 38.5                  | 38.7                  | 37.2                   |
|                                          | 14 + 24h | 38.2                  | 38.5                  | 37.5                   |
|                                          | 14 + 48h | 37.8                  | 38.7                  | 37.7                   |
|                                          | 14 + 72h | 38.6                  | 38.1                  | 37.5                   |
|                                          | 21 - 48h | 38.1                  | 38.3                  | 37.5                   |
|                                          | 21 - 24h | 38.6                  | 39.2                  | 38.2                   |
|                                          | 21       | 38.5                  | 37.2                  | 37.1                   |
|                                          | 21 + 6h  | 37.9                  | 38.7                  | 37                     |
| 21 + 24h                                 | 38.1     | 38.2                  | 37.8                  |                        |
| BW (kg)                                  | -28      | 3.6                   | 3.8                   | 3.3                    |
|                                          | -22      | 3.6                   | 3.85                  | 3.25                   |
|                                          | -14      | 3.65                  | 3.9                   | 3.3                    |
|                                          | -7       | 3.6                   | 3.9                   | 3.4                    |
|                                          | 1        | 3.65                  | 3.8                   | 3.35                   |
|                                          | 8        | 3.65                  | 3.8                   | 3.25                   |
|                                          | 15       | 3.5                   | 3.9                   | 3.35                   |
|                                          | 22       | 3.5                   | 3.7                   | 3.35                   |
| RBC (x10 <sup>12</sup> L <sup>-1</sup> ) | -14      | 6.83                  | 6.36                  | 6.48                   |
|                                          | -7       | 6.77                  | 6.24                  | 6.55                   |
|                                          | 0 + 72h  | 5.78                  | 5.74                  | 5.37                   |
|                                          | 7        | 5.89                  | 5.71                  | 6.07                   |
|                                          | 7 + 72h  | 5.75                  | 5.37                  | 5.59                   |
|                                          | 14       | 6.09                  | 5.68                  | 6.86                   |
|                                          | 14 + 72h | 6.05                  | 5.36                  | 5.63                   |
|                                          | 21       | 6.21                  | 5.95                  | 6.06                   |
|                                          | 21 + 24h | 5.13                  | 5.65                  | 5.37                   |
| PLT (x10 <sup>9</sup> L <sup>-1</sup> )  | -14      | 236                   | 247                   | 246                    |
|                                          | -7       | 164                   | 246                   | 151                    |
|                                          | 0 + 72h  | 187                   | 325                   | 312                    |
|                                          | 7        | 210                   | 384                   | 342                    |
|                                          | 7 + 72h  | 419                   | 376                   | 323                    |
|                                          | 14       | 249                   | 316                   | 344                    |
|                                          | 14 + 72h | 343                   | 285                   | 309                    |
|                                          | 21       | 292                   | 279                   | 272                    |
|                                          | 21 + 24h | 180                   | 251                   | 306                    |
| Total bilirubin (µmol L <sup>-1</sup> )  | -14      | 4                     | 4                     | 5                      |
|                                          | -7       | 5                     | 5                     | 2                      |
|                                          | 7        | 6                     | 3                     | 4                      |

|                                         |          |     |     |      |
|-----------------------------------------|----------|-----|-----|------|
|                                         | 7 + 72h  | 6   | 4   | n.a. |
|                                         | 14       | 19  | 4   | 3    |
|                                         | 21       | 7   | 4   | 3    |
|                                         | 21 + 24h | 5   | 5   | 2    |
| <b>ALP (U L<sup>-1</sup>)</b>           | -14      | 362 | 315 | 202  |
|                                         | -7       | 305 | 312 | 231  |
|                                         | 7        | 262 | 271 | 211  |
|                                         | 7 + 72h  | 308 | 261 | n.a. |
|                                         | 14       | 210 | 258 | 200  |
|                                         | 21       | 272 | 295 | 220  |
|                                         | 21 + 24h | 248 | 286 | 210  |
| <b>GGT (U L<sup>-1</sup>)</b>           | -14      | 78  | 68  | 70   |
|                                         | -7       | 73  | 69  | 74   |
|                                         | 7        | 57  | 71  | 75   |
|                                         | 7 + 72h  | 64  | 67  | n.a. |
|                                         | 14       | 45  | 71  | 78   |
|                                         | 21       | 59  | 73  | 79   |
|                                         | 21 + 24h | 59  | 72  | 79   |
| <b>ALT (U L<sup>-1</sup>)</b>           | -14      | 26  | 33  | 84   |
|                                         | -7       | 17  | 56  | 87   |
|                                         | 7        | 41  | 64  | 116  |
|                                         | 7 + 72h  | 28  | 86  | n.a. |
|                                         | 14       | 26  | 82  | 167  |
|                                         | 21       | 37  | 95  | 182  |
|                                         | 21 + 24h | 45  | 112 | 144  |
| <b>Creatinine (μmol L<sup>-1</sup>)</b> | -14      | 64  | 95  | 78   |
|                                         | -7       | 61  | 94  | 66   |
|                                         | 7        | 62  | 114 | 67   |
|                                         | 7 + 72h  | 66  | 99  | n.a. |
|                                         | 14       | 53  | 100 | 63   |
|                                         | 21       | 60  | 80  | 74   |
|                                         | 21 + 24h | 66  | 84  | 65   |

Abbreviations: BW: body weight. RBC: red blood cells. PLT: platelets. ALP: alkaline phosphatase. GGT: gamma-glutamyltransferase. ALT: alanine aminotransferase. n.a.: not assessed. The gradual decrease in RBC over time is considered to be caused by the repeated blood draws.
